# Supplementary material for: Deconstruction of cyclic and acyclic trithiocarbonates by C–S and CS bond cleavage during oxidative decarbonylation of dimolybdenum alkyne complexes †
Source: Royal Society of Chemistry journal article supplement (doi:10.1039/b004293p), 2000-01-01
Supplement: b004293p.doc [file b004293p.doc]

**Deconstruction of cyclic and acyclic trithiocarbonates by C–S and C=S bond cleavage during oxidative decarbonylation of dimolybdenum alkyne complexes**

Harry Adams, Christopher Allott, Matthew N. Bancroft and Michael J. Morris*

Analytical data for the new complexes

| **8** | Found: C, 38.72; H, 3.00; S, 13.32.  Calc. for C23H22O8S3Mo2: C, 38.66; H, 3.08; S, 13.45 % |
| --- | --- |
| **9** | Found: C, 36.22; H, 3.22; S, 22.80.  Calc. for C21H22O4S5Mo2: C, 36.52; H, 3.19; S, 23.19% |
| **10** | Found: C, 42.98; H, 2.85; S, 16.80.  Calc. for C33H26O6S5Mo2.CH2Cl2: C, 42.73; H, 2.95; S, 16.77% |
| **11** | Found: C, 40.09; H, 3.69; S, 13.12.  Calc. for C25H26O8S3Mo2: C, 40.44; H, 3.53; S, 12.95% |
| **12** | Found: C, 49.35; H, 3.46; S, 12.84.  Calc. for C31H26O4S3Mo2: C, 49.60; H, 3.47; S, 12.80% |
| **13** | Found: C, 44.97; H, 3.49; S, 13.01.  Calc. for C28H26O6S3Mo2: C, 45.05; H, 3.51; S, 12.88% |
| **14** | Found: C, 44.98; H, 3.43; S, 12.79.  Calc. for C28H26O6S3Mo2: C, 45.05; H, 3.51; S, 12.88% |
| **15** | Found: C, 35.41; H, 3.19; S, 14.02.  Calc. for C19H20O4S3Mo2.CH2Cl2: C, 35.04; H, 3.21; S, 14.01% |
| **16** | Found: C, 39.01; H, 3.24; S, 15.50.  Calc. for C20H22O4S3Mo2: C, 39.10; H, 3.61; S, 15.65% |
| **17** | Found: C, 37.77; H, 3.77; S, 16.18.  Calc. for C19H22O4S3Mo2: C, 37.88; H, 3.68; S, 15.97% |
| **18** | Found: C, 43.07; H, 4.84; S, 14.10.  Calc. for C23H30O4S3.0.25C6H12: C, 43.30; H, 4.89; S, 14.15% |
| **19** | Found: C, 44.11; H, 5.12; S, 13.83.  Calc. for C25H34O4S3Mo2: C, 43.73; H, 4.99; S, 14.00% |
